# Supplementary material for: High turnover number of γ-SiW10{MnIII(OH2)}2O386− for oxygenation of cyclohexane with 1 atm molecular oxygen
Source: Royal Society of Chemistry journal article supplement (doi:10.1039/a910334l), 2000-01-01
Supplement: a910334l.doc [file a910334l.doc]

**Experimental**

**Preparation of Polyoxometalates.** The following polyoxometalates, -SiW12O404-, -SiW11{Mn3+(H2O)}O395-, -SiW10{Mn3+(H2O)}2O386-, -SiW9{Mn3+(H2O)}3O377-, -SiW9{Fe3+(H2O)}3O377- and -SiW10{Cu2+(H2O)}2O388- were synthesized according to refs. 27 and 29-33 as follows.

**[(*n*-C4H9)4N]4[-SiW12O40].** Tetrabutylammonium salt of -SiW12O404- was precipitated by adding an excess amount of [(C4H9)4N]Br (3.5 g) to K4[-SiW12O40]•17H2O (3.0 g) according to the published method.29 Elemental Anal. Found (calcd) for [(*n*-C4H9)4N]4[-SiW12O40]: C, 20.15 (20.00); H, 3.55 (3.78); N, 1.54 (1.46). Infrared spectrum (cm-1): 967 (s), 920 (s), 884 (s) and 801 (s, br). UV-visible spectrum in acetonitrile at 296 K: max = 264 nm ( 37200 M-1cm-1). Both spectra were characteristic of -Keggin structure.

**[(*n*-C5H11)4N]4H[-SiW11{Mn3+(H2O)}O39].**  K6[-SiW11{Mn2+(H2O)}O39]•21H2O was prepared according to ref. 30. The purity of K6[-SiW11{Mn2+(H2O)}O39] •21H2O was checked by infrared (cm-1) (954(s), 903(s) and 789(s, br)) and UV-visible (max = 258 nm ( 27 000 M-1cm-1)) spectra. Potassium salt of -SiW11{Mn3+(H2O)}O395- was prepared by oxidizing -SiW11{Mn2+(H2O)}O396- with equimolar amount of K2S2O8, filtering and then crystallizing overnight in the refrigerator. The tetrapentylammonium salt was precipitated by adding an excess amount of [(C5H11)4N]Br (0.36 g) to potassium salt of -SiW11{Mn3+(H2O)}O395- (0.5 g). The precipitate was washed with an excess amount of water. Elemental Anal. Found (calcd) for [(*n*-C5H11)4N]4H[-SiW11{Mn3+(H2O)}O39]: C, 24.00 (23.89); H, 4.19 (4.46); N, 1.44 (1.39). Infrared spectrum (cm-1): 966(s), 919(s) and 798(s, br) in agreement with those of K6[-SiW11{Mn2+(H2O)}O39]•21H2O. UV-visible spectrum in acetonitrile at 296 K:  = 262 nm (44000 M-1cm-1) and 483 nm (124 M-1cm-1).

**[(*n*-C4H9)4N]4H2[-SiW10{Mn3+(H2O)}2O38]**•**1.5CH3CN**•**2H2O.** The tetrabutylammonium salt of -SiW10Mn2O386- was prepared according to the published method.31 Elemental Anal. Found (calcd) for [[(*n*-C4H9)4N]4H2[-SiW10{Mn3+(H2O)}2O38]¥1.5CH3CN¥2H2O: C, 20.96 (21.13); H, 3.97 (4.06); N, 2.18 (2.02). Infrared spectrum (cm-1): 925 (s), 911 (s), 897 (s) and 792 (s, br). UV-visible spectrum in acetonitrile at 296 K:  = 284 nm ( 15 800 M-1cm-1), 348 nm ( 3125 M-1cm-1), 460 nm ( 1150 M-1cm-1), and 580 nm ( 280 M-1cm-1).

**[(*n*-C6H13)4N]7-xHx[-SiW9{Mn3+(H2O)}3O37].** The sodium salt of -SiW9{Mn2+(H2O)}3O3710- prepared according to ref. 32 which was purified by passing through a cation-exchange column to remove free manganese ions. The purity of Na10-xHx[-SiW9{Mn2+(H2O)}3O37] was checked by infrared (cm-1) (949 (s), 901 (s), 786 (s) and 718 (s)) and UV-visible (max = 254 nm ( 25000 M-1cm-1)) spectra. To an aqueous solution of -SiW9{Mn2+(H2O)}3O3710- a few drops of chlorine water were added. After the color change, an excess amount of [(C6H13)4N]Br was added to precipitate the tetrahexylammonium salt of [-SiW9{Mn3+(H2O)}3O37]. The precipitate was washed with an excess amount of water and purified by twice dissolving it in acetonitrile and then adding water to reprecipitate the product.. Infrared spectrum (cm-1): 1002 (s), 956 (s), 916 (s), 873 (s) and 794 (s, br). UV-visible spectrum in acetonitrile at 296 K:  = 258 nm ( 38 000 M-1cm-1).

**[(*n*-C4H9)4N]3.5H2.5[-SiW10{Fe3+(H2O)}2O38]•H2O.** Tetrabutylammonium salt of -SiW10{Fe3+(H2O)}2O386- was synthesized according to ref. 27. Elemental Anal. Found (calcd) for [(*n*-C4H9)4N]3.5H2.5[-SiW10{Fe(H2O)}2O38]•H2O: C, 19.08 (19.26); H, 3.63 (3.88); N, 1.58 (1.40). Infrared spectrum (cm-1): 1025 (w), 961 (s), 903 (s), 886 (s), 797 (s), 755 (s, br) and 547 (w). UV-visible spectrum in acetonitrile at 296 K:  = 275 nm ( 22600 M-1cm-1) and 334 nm ( 10000 M-1cm-1).

**[(*n*-C4H9)4N]3.75H4.25[-SiW10{Cu2+(H2O)}2O38].**  Tetrabutylammonium salt of -SiW10{CuII(H2O)}2O388- was prepared according to the published method.33 Elemental Anal. Found (calcd) for [(*n*-C4H9)4N]3.75H4.25[-SiW10{Cu2+(H2O)}2O38]: C, 20.68 (20.64); H, 3.90 (3.99); N, 1.62 (1.51). Infrared spectrum (cm-1): 999 (m), 959 (s), 899 (s), 875 (s), 777 (s, br) and 553 (m). UV-visible spectrum in acetonitrile at 296 K:  = 270 nm ( 22800 M-1cm-1), 340 nm ( 2790 M-1cm-1), 720 nm ( 35 M-1cm-1) and 870 nm ( 25 M-1cm-1).
